# Supplementary material
Source: publisher site journal article supplement (https://www.dovepress.com/article/397900)
Supplement: Supplementary file 1 [file get_supplementary_file.php]

**Supplementary S1. Sleep electroencephalographic changes after a sports-related concussion.**

Presented is age and biological sex matched normative data, based off a published meta-analysis of 5273 participants from 169 studies.1 The values presented below were taken from the online calculator created by this meta-analysis (<https://omc.ohri.ca/psgnorms/>). This data was used to compare to the acute and subacute post-sports related concussion sleep data.

Table S1. Age and biological sex matched normative data.

| Age | Biological sex | N1% | N2% | N3% | REM% | ArI (/h) | TST (mins) | SOL (mins) | SE (%) | WASO (mins) | REM latency (mins) |
| --- | --- | --- | --- | --- | --- | --- | --- | --- | --- | --- | --- |
| 21 | M | 6.42 | 52.08 | 21.05 | 19.25 | 10.43 | 395.69 | 13.88 | 88.24 | 32.16 | 96.16 |
| 20 | M | 6.37 | 52.08 | 21.1 | 19.27 | 10.22 | 396.71 | 13.77 | 88.45 | 31.20 | 96.15 |
| 25 | M | 6.61 | 52.10 | 20.82 | 19.13 | 11.25 | 391.64 | 14.32 | 87.41 | 36.03 | 96.22 |
| 22 | M | 6.47 | 52.09 | 20.99 | 19.22 | 10.63 | 394.68 | 13.99 | 88.03 | 33.13 | 96.18 |
| 19 | M | 6.32 | 52.07 | 21.16 | 19.30 | 10.02 | 397.72 | 13.66 | 88.66 | 30.23 | 96.43 |
| 20 | M | 6.37 | 52.08 | 21.1 | 19.27 | 10.22 | 396.71 | 13.77 | 88.45 | 31.20 | 96.15 |
| 33 | F | 6.56 | 52.74 | 21.91 | 17.77 | 10.35 | 380.62 | 13.49 | 87.1 | 43.30 | 105.04 |
| 25 | M | 6.61 | 52.10 | 20.82 | 19.13 | 11.25 | 391.64 | 14.32 | 87.41 | 36.03 | 96.22 |
| 36 | F | 6.71 | 52.76 | 21.74 | 17.69 | 10.96 | 377.58 | 13.81 | 88.48 | 46.2 | 105.08 |
| 52 | F | 7.49 | 52.83 | 20.84 | 17.24 | 14.24 | 361.36 | 15.57 | 83.17 | 61.64 | 105.32 |

**Abbreviations:** N1%, proportion of total sleep spent in Stage 1; N2%, proportion of total sleep spent in Stage 2; N3%, proportion of total sleep spent in Stage 3; REM%, percent of total sleep spent in rapid eye movement (REM) sleep; ArI, cortical arousal index; TST, total sleep time; SOL, sleep onset latency; SE, sleep efficiency; WASO, wake after sleep onset; REM latency, latency to the onset of rapid eye movement sleep.

**Supplementary Reference**

1. Boulos MI, Jairam T, Kendzerska T, Im J, Mekhael A, Murray BJ. Normal polysomnography parameters in healthy adults: a systematic review and meta-analysis. *Lancet Respir Med.* 2019;7(6):533-543.
